# Supplementary material for: A Quantitative Genomic Approach for Analysis of Fitness and Stress Related Traits in aDrosophila melanogasterModel Population
Source: Hindawi journal article supplement (doi:10.1155/2016/2157494), 2016-01-01
Supplement: f1 [file 2157494.f1.zip]

**Table S1:** Summary of DGRP lines assayed and the number of biological replicates for egg-to-adult viability at benign and stressful temperatures, heat resistance, metabolic rate and Hsp70 expression.

| Id  | Egg-to-adult<br>viability, 25°C* | Egg-to-adult<br>viability, 28°C* | Heat<br>resistance | Metabolic rate <sup>†</sup> | Hsp70 expression <sup>†</sup> |
|-----|----------------------------------|----------------------------------|--------------------|-----------------------------|-------------------------------|
| 208 | 5 (40)                           | 10 (20)                          | 24                 | 15 (18.8±0.5)               | 3 (7.7±1.3)                   |
| 313 | 5 (40)                           | 10 (20)                          | 18                 | 9 (16.7±1.9)                | 3 (10±0)                      |
| 357 | 5 (40)                           | 10 (20)                          | 23                 | 9 (20.4±1.5)                | 3 (10±0)                      |
| 358 | 5 (40)                           | 10 (20)                          | 20                 | 9 (19.9±0.2)                | 3 (8.3±1.0)                   |
| 362 | 5 (40)                           | 10 (20)                          | 24                 | 7 (16.4±2.4)                | NA                            |
| 365 | 5 (40)                           | 10 (20)                          | 23                 | 9 (19.2±0.2)                | 2 (4±1.4)                     |
| 375 | 5 (40)                           | 10 (20)                          | 24                 | 9 (18.1±1.2)                | 3 (10±0)                      |
| 379 | 5 (40)                           | 10 (20)                          | 24                 | 10 (19.4±0.3)               | NA                            |
| 380 | 5 (40)                           | 10 (20)                          | 22                 | 9 (19.6±0.2)                | 3 (10±0)                      |
| 391 | 5 (40)                           | 10 (20)                          | 24                 | 8 (18.6±0.5)                | 3 (10±0)                      |
| 399 | 5 (40)                           | 10 (20)                          | 23                 | 10 (19.1±0.4)               | 3 (9.7±0.2)                   |
| 427 | 5 (40)                           | 10 (20)                          | 24                 | 9 (18.2±1.1)                | 3 (10±0)                      |
| 437 | 5 (40)                           | 10 (20)                          | 24                 | 9 (17.8±1.2)                | 3 (10±0)                      |
| 517 | 5 (40)                           | 10 (20)                          | 23                 | 11 (16.2±1.6)               | 3 (10±0)                      |
| 555 | 5 (40)                           | 10 (20)                          | 24                 | 11 (19.4±0.4)               | NA                            |
| 639 | 5 (40)                           | 10 (20)                          | 24                 | 2 (4.5±1.5)                 | 3 (8.7±0.4)                   |
| 707 | 1 (33)                           | NA                               | 3                  | 7 (20.1±0.5)                | 2 (10±0)                      |
| 705 | 5 (40)                           | 10 (20)                          | 23                 | NA                          | NA                            |
| 712 | 5 (40)                           | 10 (20)                          | 12                 | 9 (18.1±1.0)                | 3 (10±0)                      |
| 714 | 5 (40)                           | 10 (20)                          | 7                  | 4 (15.8±3.3)                | NA                            |
| 730 | 5 (40)                           | 10 (20)                          | 20                 | NA                          | NA                            |
| 732 | 5 (40)                           | 10 (20)                          | 14                 | 8 (19.0±1.2)                | 3 (10±0)                      |
| 774 | 5 (40)                           | 10 (20)                          | 14                 | 8 (19.9±0.2)                | 3 (9.7±0.2)                   |
| 786 | 5 (40)                           | 10 (20)                          | 23                 | 8 (19.0±0.3)                | 3 (10±0)                      |
| 799 | 5 (40)                           | 10 (20)                          | 17                 | NA                          | 3 (10±0)                      |
| 820 | 5 (40)                           | 10 (20)                          | 24                 | 9 (19.3±0.2)                | 2 (2.5±0.4)                   |
| 852 | 5 (40)                           | 10 (20)                          | 16                 | 10 (18.1±1.3)               | 3 (10±0)                      |

\* The number in parenthesis is the number of eggs per replicate.

<sup>†</sup> The number in parenthesis is mean number of flies ( $\pm$  SE) within each replicate.

**Table S2:** Line means for the phenotypes with standard errors ( $\sigma/\sqrt{n}$ ) given in parentheses. The lines are ordered after increasing egg-to-adult viability at 25°C. NA indicates that a particular line was not assayed and '-' indicates that the standard error could not be computed because of missing values or that the line only was assayed once (Table S1).

| Id  | Egg-to-adult<br>viability, 25°C* | Egg-to-adult<br>viability, 28°C* | GxE <sup>†</sup> | Heat resistance <sup>‡</sup> | Metabolic rate <sup>§</sup> | Hsp70 expression |
|-----|----------------------------------|----------------------------------|------------------|------------------------------|-----------------------------|------------------|
| 714 | 0.14 (0.03)                      | 0.03 (0.01)                      | 0.11             | 76.86 (10.01)                | NA (-)                      | 12.19 (1.33)     |
| 707 | 0.18 (-)                         | NA (-)                           | NA               | 44.36 (9.31)                 | 1.57 (0.12)                 | 12 (0.82)        |
| 712 | 0.2 (0.03)                       | 0.15 (0.04)                      | 0.05             | 74.74 (5.94)                 | 1.59 (0.16)                 | 15.99 (0.83)     |
| 852 | 0.23 (0.02)                      | 0.11 (0.04)                      | 0.13             | 58.15 (4.1)                  | 1.59 (0.25)                 | 12.78 (0.41)     |
| 555 | 0.28 (0.03)                      | 0.22 (0.02)                      | 0.06             | 93.41 (3.23)                 | NA (-)                      | 16.49 (0.5)      |
| 427 | 0.32 (0.03)                      | 0 (-)                            | 0.32             | 80.9 (3.8)                   | 1.41 (0.04)                 | 12.12 (0.41)     |
| 799 | 0.33 (0.04)                      | 0.18 (0.05)                      | 0.15             | 95.14 (7.83)                 | 1.57 (0.11)                 | NA (-)           |
| 358 | 0.42 (0.03)                      | 0.3 (0.04)                       | 0.13             | 73.21 (4.52)                 | 1.64 (0.29)                 | 12.85 (0.44)     |
| 313 | 0.42 (0.03)                      | 0.36 (0.05)                      | 0.06             | 110.16 (6.11)                | 1.51 (0.24)                 | 13.24 (1.01)     |
| 820 | 0.44 (0.06)                      | 0.31 (0.05)                      | 0.13             | 59.71 (4.07)                 | 1.41 (-)                    | 16.35 (0.52)     |
| 786 | 0.49 (0.08)                      | 0.34 (0.03)                      | 0.15             | 71.67 (5.0)                  | 1.55 (0.12)                 | 13.91 (0.61)     |
| 730 | 0.51 (0.03)                      | 0.27 (0.04)                      | 0.25             | 81.62 (5.0)                  | NA (-)                      | NA (-)           |
| 639 | 0.52 (0.1)                       | 0.22 (0.07)                      | 0.31             | 77.31 (5.71)                 | 1.45 (0.05)                 | 11.49 (1.49)     |
| 705 | 0.52 (0.05)                      | 0.46 (0.05)                      | 0.06             | 98.9 (7.52)                  | NA (-)                      | NA (-)           |
| 379 | 0.53 (0.08)                      | 0.16 (0.03)                      | 0.37             | 66.01 (3.82)                 | NA (-)                      | 10.42 (0.49)     |
| 391 | 0.54 (0.03)                      | 0.13 (0.03)                      | 0.41             | 88.76 (4.15)                 | 1.66 (0.22)                 | 13.61 (0.72)     |
| 365 | 0.57 (0.08)                      | 0.19 (0.03)                      | 0.38             | 101.49 (3.49)                | 1.29 (0.02)                 | 19.1 (0.44)      |
| 375 | 0.64 (0.06)                      | 0.33 (0.06)                      | 0.31             | 97.13 (5.66)                 | 1.77 (0.21)                 | 16.29 (0.65)     |
| 380 | 0.67 (0.03)                      | 0.6 (0.06)                       | 0.07             | 81.48 (3.56)                 | 1.16 (0.07)                 | 12.26 (0.77)     |
| 399 | 0.68 (0.08)                      | 0.39 (0.04)                      | 0.3              | 94.03 (4.64)                 | 1.53 (0.14)                 | 11.11 (0.43)     |
| 357 | 0.74 (0.06)                      | 0.63 (0.05)                      | 0.11             | 47.62 (2.19)                 | 1.69 (0.25)                 | 15.76 (1.01)     |
| 362 | 0.74 (0.03)                      | 0.23 (0.06)                      | 0.51             | 85.7 (4.2)                   | NA (-)                      | 12.66 (1.45)     |
| 732 | 0.76 (0.07)                      | 0.36 (0.03)                      | 0.4              | 80.26 (4.8)                  | 1.72 (0.18)                 | 13.14 (0.46)     |
| 437 | 0.77 (0.02)                      | 0.65 (0.03)                      | 0.12             | 58.38 (3.05)                 | 1.46 (0.11)                 | 15.44 (0.84)     |
| 208 | 0.8 (0.03)                       | 0.74 (0.06)                      | 0.06             | 83.71 (1.73)                 | 1.43 (0.18)                 | 12.62 (0.38)     |
| 517 | 0.82 (0.04)                      | 0.31 (0.06)                      | 0.51             | 51.27 (4.05)                 | 1.38 (0.13)                 | 14.4 (0.46)      |
| 774 | 0.92 (0.02)                      | 0.88 (0.03)                      | 0.04             | 111.94 (3.7)                 | 1.36 (0.06)                 | 13.65 (0.76)     |

\* Proportion of eggs that developed to adulthood, %.

† The difference between egg-to-adult viability at 25°C and 28°C.

‡ Time (min) to heat knock down.

§  $CO_2$  emission rate,  $\mu\text{L h}^{-1} \text{mg}^{-1}$

**Table S3:** Summary of likelihood ratio test for fixed effects. The fixed effects tested were *Wolbachia* infection (Wo), and five major inversions, I2Lt, I2RNS, I3RP, I3RK and I3RMo. The table contains the  $\chi^2_1$  values with one degree of freedom, and the associated p value (p val) when removing that variable from the full model. Significance at  $p < 0.05$  is indicated with a \*.

| Trait                        | Wo         |       | I2Lt       |       | I2RNS      |       | I3RP       |       | I3RK       |       | I3RMo      |        |
|------------------------------|------------|-------|------------|-------|------------|-------|------------|-------|------------|-------|------------|--------|
|                              | $\chi^2_1$ | p val  |
| Metabolic rate               | 1.095      | 0.295 | 0.177      | 0.674 | 0.546      | 0.460 | 0.036      | 0.849 | 0.066      | 0.935 | 0.608      | 0.436  |
| Heat resistance              | 0.842      | 0.359 | 2.251      | 0.112 | 2.376      | 0.066 | 1.108      | 0.293 | 0.016      | 0.899 | 6.284      | 0.012* |
| Hsp70 expression             | 2.678      | 0.102 | 0.0007     | 0.979 | 1.760      | 0.185 | 1.191      | 0.275 | 1.699      | 0.192 | 1.576      | 0.209  |
| Egg-to-adult viability, 25°C | 1.434      | 0.231 | 0.641      | 0.424 | 3.056      | 0.080 | 0.132      | 0.716 | 0.054      | 0.817 | 7.4        | 0.007* |
| Egg-to-adult viability, 28°C | 0.141      | 0.707 | 0.020      | 0.888 | 1.264      | 0.261 | 0.023      | 0.880 | 0.005      | 0.945 | 0.647      | 0.421  |

**Table S4:** Overview of GOs with a  $p < 0.005$  for the five traits investigated.

| GO term                      | $T_{sum}^*$ | $n^\dagger$ | p value | METABOLIC RATE     |                                                              |
|------------------------------|-------------|-------------|---------|--------------------|--------------------------------------------------------------|
|                              |             |             |         | Class <sup>‡</sup> | GO description                                               |
| GO:0008356                   | 4.10E-07    | 5832        | 0.0003  | BP                 | Asymmetric cell division                                     |
| GO:0005768                   | 2.59E-07    | 3213        | 0.0006  | CC                 | Endosome                                                     |
| GO:0042067                   | 5.07E-07    | 7999        | 0.0008  | BP                 | Establishment of ommatidial planar polarity                  |
| GO:0016791                   | 1.36E-09    | 616         | 0.0008  | MF                 | Phosphatase activity                                         |
| GO:0048786                   | 2.46E-07    | 3419        | 0.0012  | CC                 | Presynaptic active zone                                      |
| GO:0008105                   | 2.31E-07    | 3059        | 0.0013  | BP                 | Asymmetric protein localization                              |
| GO:0010951                   | 4.15E-08    | 515         | 0.0016  | BP                 | Negative regulation of endopeptidase activity                |
| GO:0001738                   | 2.66E-07    | 3724        | 0.0026  | BP                 | Morphogenesis of a polarized epithelium                      |
| GO:0035006                   | 3.91E-08    | 429         | 0.0037  | BP                 | Melanization defense response                                |
| GO:0045746                   | 4.38E-07    | 6896        | 0.0037  | BP                 | Negative regulation of Notch signaling pathway               |
| GO:0005887                   | 1.84E-06    | 33118       | 0.0037  | CC                 | Integral to plasma membrane                                  |
| GO:0008104                   | 4.85E-07    | 7881        | 0.0039  | BP                 | Protein localization                                         |
| GO:0006891                   | 2.60E-08    | 310         | 0.0041  | BP                 | Intra-Golgi vesicle-mediated transport                       |
| GO:0030246                   | 7.46E-09    | 4788        | 0.0042  | MF                 | Carbohydrate binding                                         |
| HEAT RESISTANCE              |             |             |         |                    |                                                              |
| GO:0016614                   | 0.022       | 964         | 0.0008  | MF                 | Oxidoreductase activity acting on CH-OH group                |
| GO:0008345                   | 0.086       | 4986        | 0.0023  | BP                 | Larval locomotory behavior                                   |
| GO:0000149                   | 0.024       | 1172        | 0.0045  | MF                 | SNARE binding                                                |
| GO:0030170                   | 0.026       | 1483        | 0.0049  | MF                 | Pyridoxal phosphate binding                                  |
| HSP70 EXPRESSION             |             |             |         |                    |                                                              |
| GO:0007306                   | 1.17E-10    | 465         | 0.0001  | BP                 | Eggshell chorion assembly                                    |
| GO:0042600                   | 1.29E-10    | 683         | 0.0004  | CC                 | Chorion                                                      |
| GO:0004601                   | 2.67E-10    | 1696        | 0.0011  | MF                 | Peroxidase activity                                          |
| GO:0032259                   | 5.80E-11    | 282         | 0.0017  | BP                 | Methylation                                                  |
| GO:0004004                   | 1.29E-10    | 971         | 0.0027  | MF                 | ATP-dependent RNA helicase activity                          |
| GO:0005686                   | 5.29E-11    | 296         | 0.0028  | CC                 | U2 snRNP                                                     |
| GO:0008168                   | 1.03E-10    | 712         | 0.0033  | MF                 | Methyltransferase activity                                   |
| GO:0005681                   | 1.10E-10    | 868         | 0.0033  | CC                 | Spliceosomal complex                                         |
| GO:0001737                   | 6.63E-10    | 5527        | 0.0044  | BP                 | Establishment of imaginal disc-derived wing hair orientation |
| EGG-TO-ADULT VIABILITY, 25°C |             |             |         |                    |                                                              |
| GO:0030176                   | 4.84E-10    | 490         | 0.0018  | CC                 | Integral to endoplasmic reticulum membrane                   |
| GO:0004364                   | 3.93E-10    | 461         | 0.0034  | MF                 | Glutathione transferase activity                             |
| GO:0005669                   | 2.91E-10    | 359         | 0.0035  | CC                 | Transcription factor TFIID complex                           |
| GO:0007498                   | 7.16E-09    | 11664       | 0.0045  | BP                 | Mesoderm development                                         |
| EGG-TO-ADULT VIABILITY, 28°C |             |             |         |                    |                                                              |
| GO:0016791                   | 1.36E-09    | 616         | 0.0008  | MF                 | phosphatase activity                                         |
| GO:0000077                   | 2.41E-09    | 1057        | 0.0026  | BP                 | DNA damage checkpoint                                        |
| GO:0030246                   | 7.46E-09    | 4788        | 0.0042  | MF                 | carbohydrate binding                                         |

\*  $T_{sum} = \sum_{i=1}^n \hat{s}_i$ , where  $\hat{s}_i$  is the genomic marker effect of the  $i^{th}$  marker, and  $n$  is the number of markers within the GO.

<sup>†</sup> The number of markers within the tested GO.

<sup>‡</sup> The GOs can be divided into three classes; BP: biological processes, MF: molecular function, CC: cellular component.

**Table S5:** Overview of GOs identified ( $p < 0.05$ ) across traits. GOs in bold indicate that the overlap is significant at  $p < 0.05$ . Each column is the comparison between two traits; i.e., 'met2heat' is GOs with  $p < 0.05$  found in both metabolic rate and heat resistance. The following abbreviations are used; met: metabolic rate, hsp: Hsp70 expression, eggB: egg-to-adult viability at 25°C, eggH: egg-to-adult viability at 28°C, 2: indicate that the overlap is between trait 1 and trait 2.

| BIOLOGICAL PROCESSES     |                                                                                                                                                                                                                                                                                                                         |                                                      |                                                      |            |            |                          |                                        |                                                      |                                                                                                                                                                                                                                     |
|--------------------------|-------------------------------------------------------------------------------------------------------------------------------------------------------------------------------------------------------------------------------------------------------------------------------------------------------------------------|------------------------------------------------------|------------------------------------------------------|------------|------------|--------------------------|----------------------------------------|------------------------------------------------------|-------------------------------------------------------------------------------------------------------------------------------------------------------------------------------------------------------------------------------------|
| met2heat                 | met2hsp                                                                                                                                                                                                                                                                                                                 | met2eggB                                             | met2eggH                                             | heat2hsp   | heat2eggB  | heat2eggH                | hsp2eggB                               | hsp2eggH                                             | eggB2eggH                                                                                                                                                                                                                           |
| GO:0043524<br>GO:0060070 | <b>GO:0001736</b><br><b>GO:0001737</b><br><b>GO:0001738</b><br><b>GO:0001745</b><br><b>GO:0007163</b><br><b>GO:0007306</b><br><b>GO:0007464</b><br><b>GO:0008104</b><br><b>GO:0008105</b><br><b>GO:0009790</b><br><b>GO:0016360</b><br><b>GO:0035206</b><br><b>GO:0042067</b><br><b>GO:0045746</b><br><b>GO:0060070</b> | GO:0006367<br>GO:0006379<br>GO:0006891<br>GO:0035025 | GO:0006367<br>GO:0006379<br>GO:0034472<br>GO:0035025 | GO:0060070 |            | GO:0050808               | GO:0001522<br>GO:0009649<br>GO:0045089 | GO:0001522<br>GO:0009649<br>GO:0035010<br>GO:0045089 | <b>GO:0000077</b><br><b>GO:0001522</b><br><b>GO:0006364</b><br><b>GO:0006367</b><br><b>GO:0006379</b><br><b>GO:0007031</b><br><b>GO:0009649</b><br><b>GO:0010001</b><br><b>GO:0035025</b><br><b>GO:0040011</b><br><b>GO:0045089</b> |
| MOLECULAR FUNCTION       |                                                                                                                                                                                                                                                                                                                         |                                                      |                                                      |            |            |                          |                                        |                                                      |                                                                                                                                                                                                                                     |
| met2heat                 | met2hsp                                                                                                                                                                                                                                                                                                                 | met2eggB                                             | met2eggH                                             | heat2hsp   | heat2eggB  | heat2eggH                | hsp2eggB                               | hsp2eggH                                             | eggB2eggH                                                                                                                                                                                                                           |
| GO:0017147<br>GO:0030165 | <b>GO:0004601</b><br><b>GO:0008235</b><br><b>GO:0008239</b><br><b>GO:0017147</b>                                                                                                                                                                                                                                        | GO:0005089                                           | GO:0005089<br>GO:0030165                             | GO:0017147 | GO:0042826 | GO:0016853<br>GO:0030165 |                                        |                                                      | <b>GO:0001104</b><br><b>GO:0005089</b><br><b>GO:0005316</b><br><b>GO:0008083</b><br><b>GO:0016791</b><br><b>GO:0030246</b>                                                                                                          |
| CELLULAR COMPONENTS      |                                                                                                                                                                                                                                                                                                                         |                                                      |                                                      |            |            |                          |                                        |                                                      |                                                                                                                                                                                                                                     |
| met2heat                 | met2hsp                                                                                                                                                                                                                                                                                                                 | met2eggB                                             | met2eggH                                             | heat2hsp   | heat2eggB  | heat2eggH                | hsp2eggB                               | hsp2eggH                                             | eggB2eggH                                                                                                                                                                                                                           |
|                          | GO:0005768<br>GO:0042600                                                                                                                                                                                                                                                                                                | GO:0005669<br>GO:0042600                             | GO:0042600                                           |            |            | GO:0030139               | GO:0042600                             | GO:0000139<br>GO:0042600                             | <b>GO:0016592</b><br><b>GO:0030176</b><br><b>GO:0030286</b><br><b>GO:0042600</b>                                                                                                                                                    |
